# Supplementary material for: Three-membered beryllium ring, Be3: not just a hydrogen bond acceptor
Source: Royal Society of Chemistry journal article supplement (doi:10.1039/d3cp01979a), 2023-01-01
Supplement: d3cp01979a1.pdf [file d3cp01979a1.pdf]

**Supporting Information**  
**Of**  
**Three – Membered Beryllium Ring, Be<sub>3</sub>: Not Just Hydrogen Bond**  
**Acceptor**

Cartesian coordinates, lowest vibrational frequency ( $\nu_1$ ,  $\text{cm}^{-1}$ ) and total energies (a.u.) of all the optimized geometries.

### **Be<sub>3</sub>**

$$\nu_1 = 467.1$$

#### **E<sub>B97XD</sub>**

$$\text{Sum of electronic and zero-point Energies} = -44.032108$$

$$\text{Sum of electronic and thermal Energies} = -44.028547$$

$$\text{Sum of electronic and thermal Enthalpies} = -44.027603$$

$$\text{Sum of electronic and thermal Free Energies} = -44.055862$$

$$E_{\text{CCSD(T)}} = -43.8762823$$

$$4 \quad -1.103048000 \quad 0.636365000 \quad 0.000000000$$

$$4 \quad 1.103048000 \quad 0.637030000 \quad 0.000000000$$

$$4 \quad 0.000000000 \quad -1.273395000 \quad 0.000000000$$

### **HF**

$$\nu_1 = 4166.6$$

#### **E<sub>B97XD</sub>**

$$\text{Sum of electronic and zero-point Energies} = -100.455730$$

$$\text{Sum of electronic and thermal Energies} = -100.453369$$

$$\text{Sum of electronic and thermal Enthalpies} = -100.452425$$

$$\text{Sum of electronic and thermal Free Energies} = -100.472124$$

$$E_{\text{CCSD(T)}} = -100.3445451$$

$$1 \quad 0.000000000 \quad 0.000000000 \quad -0.824410000$$

$$9 \quad 0.000000000 \quad 0.000000000 \quad 0.091601000$$

### **HCl**

$$\nu_1 = 2965.5$$

#### **E<sub>B97XD</sub>**

$$\text{Sum of electronic and zero-point Energies} = -460.811540$$

$$\text{Sum of electronic and thermal Energies} = -460.809180$$

$$\text{Sum of electronic and thermal Enthalpies} = -460.808235$$

$$\text{Sum of electronic and thermal Free Energies} = -460.829415$$

|    |             |             |              |
|----|-------------|-------------|--------------|
| 1  | 0.000000000 | 0.000000000 | -1.206316000 |
| 17 | 0.000000000 | 0.000000000 | 0.070960000  |

### H<sub>2</sub>O

$\nu_1 = 1639.9$

#### E<sub>B97XD</sub>

|                                             |   |            |
|---------------------------------------------|---|------------|
| Sum of electronic and zero-point Energies   | = | -76.419736 |
| Sum of electronic and thermal Energies      | = | -76.416901 |
| Sum of electronic and thermal Enthalpies    | = | -76.415957 |
| Sum of electronic and thermal Free Energies | = | -76.437361 |

|   |             |              |              |
|---|-------------|--------------|--------------|
| 8 | 0.000000000 | 0.000000000  | 0.116401000  |
| 1 | 0.000000000 | 0.758516000  | -0.465605000 |
| 1 | 0.000000000 | -0.758516000 | -0.465605000 |

### HCN

$\nu_1 = 764.1$

#### E<sub>B97XD</sub>

|                                             |   |            |
|---------------------------------------------|---|------------|
| Sum of electronic and zero-point Energies   | = | -93.408486 |
| Sum of electronic and thermal Energies      | = | -93.405947 |
| Sum of electronic and thermal Enthalpies    | = | -93.405003 |
| Sum of electronic and thermal Free Energies | = | -93.427841 |

|   |             |             |              |
|---|-------------|-------------|--------------|
| 1 | 0.000000000 | 0.000000000 | -1.562645000 |
| 6 | 0.000000000 | 0.000000000 | -0.495545000 |
| 7 | 0.000000000 | 0.000000000 | 0.647988000  |

### Be<sub>3</sub>-HF system

#### A

$\nu_1 = 18.5$

#### E<sub>B97XD</sub>

|                                             |   |             |
|---------------------------------------------|---|-------------|
| Sum of electronic and zero-point Energies   | = | -144.495315 |
| Sum of electronic and thermal Energies      | = | -144.489057 |
| Sum of electronic and thermal Enthalpies    | = | -144.488113 |
| Sum of electronic and thermal Free Energies | = | -144.525740 |

$E_{\text{CCSD(T)}} = -144.2252443$

|   |              |              |              |
|---|--------------|--------------|--------------|
| 4 | -1.052942000 | 1.092403000  | 0.029818000  |
| 4 | -1.059897000 | -1.095837000 | 0.029553000  |
| 4 | -2.922416000 | 0.003930000  | -0.038269000 |
| 1 | 1.171192000  | -0.005506000 | 0.019821000  |
| 9 | 2.107759000  | 0.000392000  | -0.011581000 |

**B**

$v_1 = 18.5$

$E_{\text{B97XD}}$

|                                             |   |             |
|---------------------------------------------|---|-------------|
| Sum of electronic and zero-point Energies   | = | -144.604145 |
| Sum of electronic and thermal Energies      | = | -144.599667 |
| Sum of electronic and thermal Enthalpies    | = | -144.598723 |
| Sum of electronic and thermal Free Energies | = | -144.629870 |

$E_{\text{CCSD(T)}} = -144.3145318$

|   |              |              |              |
|---|--------------|--------------|--------------|
| 4 | 1.820920000  | -0.007519000 | -0.436208000 |
| 4 | 0.159453000  | -0.984599000 | 0.317818000  |
| 4 | 0.168747000  | 0.990951000  | 0.306664000  |
| 1 | 0.348974000  | 0.013787000  | 1.503418000  |
| 9 | -0.993939000 | -0.001013000 | -0.250724000 |

**TS<sub>B-C/D</sub>**

$v_1 = -410.7$

$E_{\text{B97XD}}$

|                                             |   |             |
|---------------------------------------------|---|-------------|
| Sum of electronic and zero-point Energies   | = | -144.601072 |
| Sum of electronic and thermal Energies      | = | -144.596393 |
| Sum of electronic and thermal Enthalpies    | = | -144.595448 |
| Sum of electronic and thermal Free Energies | = | -144.627425 |

$E_{\text{CCSD(T)}} = -144.307532$

|   |              |              |              |
|---|--------------|--------------|--------------|
| 4 | 1.796813000  | 0.227874000  | -0.238119000 |
| 4 | 0.342500000  | -1.020450000 | -0.065900000 |
| 4 | -0.010326000 | 1.053539000  | 0.177429000  |

|   |              |              |              |
|---|--------------|--------------|--------------|
| 1 | 0.860080000  | -0.674982000 | 1.228561000  |
| 9 | -1.041781000 | -0.040986000 | -0.080244000 |

**C**

$v_1 = 163.0$

**E<sub>B97XD</sub>**

|                                             |   |             |
|---------------------------------------------|---|-------------|
| Sum of electronic and zero-point Energies   | = | -144.644265 |
| Sum of electronic and thermal Energies      | = | -144.639157 |
| Sum of electronic and thermal Enthalpies    | = | -144.638213 |
| Sum of electronic and thermal Free Energies | = | -144.671261 |

**E<sub>CCSD(T)</sub> = -144.3678414**

|   |              |              |              |
|---|--------------|--------------|--------------|
| 4 | -0.276229000 | 0.000129000  | 0.000041000  |
| 4 | 1.661643000  | -1.057222000 | -0.000006000 |
| 4 | 1.663511000  | 1.057277000  | -0.000006000 |
| 9 | -1.665602000 | 0.000151000  | -0.000011000 |
| 1 | 2.794724000  | -0.002094000 | -0.000016000 |

**D**

$v_1 = 247.2$

**E<sub>B97XD</sub>**

|                                             |   |             |
|---------------------------------------------|---|-------------|
| Sum of electronic and zero-point Energies   | = | -144.638988 |
| Sum of electronic and thermal Energies      | = | -144.634018 |
| Sum of electronic and thermal Enthalpies    | = | -144.633074 |
| Sum of electronic and thermal Free Energies | = | -144.665163 |

**E<sub>CCSD(T)</sub> = -144.3534475**

|   |              |              |              |
|---|--------------|--------------|--------------|
| 4 | 0.365746000  | -2.456300000 | -0.257642000 |
| 4 | 1.498168000  | -0.976392000 | 0.882416000  |
| 4 | -0.065559000 | -0.328328000 | -0.495082000 |
| 1 | 0.116824000  | -3.738807000 | -0.579303000 |
| 9 | 0.925993000  | 0.430627000  | 0.465702000  |

**TS<sub>C-E</sub>**

$v_1 = -703.7$

**E<sub>B97XD</sub>**

Sum of electronic and zero-point Energies = -144.638449  
Sum of electronic and thermal Energies = -144.633025  
Sum of electronic and thermal Enthalpies = -144.632081  
Sum of electronic and thermal Free Energies = -144.665551

**E<sub>CCSD(T)</sub>** = -144.3456269

|   |              |              |              |
|---|--------------|--------------|--------------|
| 4 | 0.681550000  | -0.078400000 | 0.000020000  |
| 4 | -3.313231000 | -0.026866000 | -0.000386000 |
| 4 | -1.379635000 | -0.311428000 | 0.000439000  |
| 9 | 2.057013000  | 0.055310000  | -0.000085000 |
| 1 | -2.467851000 | 1.168990000  | 0.000475000  |

**TS<sub>D-E</sub>**

$\nu_1 = -700.2$

**E<sub>B97XD</sub>**

Sum of electronic and zero-point Energies = -144.578889  
Sum of electronic and thermal Energies = -144.573548  
Sum of electronic and thermal Enthalpies = -144.572604  
Sum of electronic and thermal Free Energies = -144.605958

**E<sub>CCSD(T)</sub>** = -144.2916339

|   |              |              |              |
|---|--------------|--------------|--------------|
| 4 | -1.425696000 | 2.136874000  | 0.440653000  |
| 4 | -1.962873000 | -1.623186000 | -0.601680000 |
| 4 | -1.693987000 | 0.247916000  | 0.219284000  |
| 1 | -1.073047000 | 1.517644000  | -0.846121000 |
| 9 | -0.734253000 | -1.140115000 | 0.085243000  |

**E**

$\nu_1 = 111.6$

**E<sub>B97XD</sub>**

Sum of electronic and zero-point Energies = -144.696958  
Sum of electronic and thermal Energies = -144.691642  
Sum of electronic and thermal Enthalpies = -144.690698

Sum of electronic and thermal Free Energies= -144.718737

$E_{\text{CCSD(T)}} = -144.4057569$

4 -0.017796000 -3.402810000 -0.000006000

4 -0.001965000 -1.275593000 0.000008000

4 0.009700000 0.836536000 0.000014000

1 -0.027910000 -4.751624000 -0.000015000

9 0.017346000 2.218183000 -0.000001000

### **Be<sub>3</sub>-HCl system**

**A**

$\nu_1 = 41.2$

$E_{\text{B97XD}}$

Sum of electronic and zero-point Energies = -504.848353

Sum of electronic and thermal Energies = -504.841773

Sum of electronic and thermal Enthalpies = -504.840829

Sum of electronic and thermal Free Energies= -504.879658

$E_{\text{CCSD(T)}} = -504.2105202$

4 -1.195560000 1.095548000 0.073373000

4 -1.201157000 -1.098058000 0.072526000

4 -3.069165000 0.003437000 -0.098024000

1 1.204350000 -0.005072000 0.040360000

17 2.505229000 -0.000472000 -0.058893000

**E**

$\nu_1 = 99.7$

$E_{\text{B97XD}}$

Sum of electronic and zero-point Energies = -505.037302

Sum of electronic and thermal Energies = -505.031807

Sum of electronic and thermal Enthalpies = -505.030862

Sum of electronic and thermal Free Energies= -505.062776

$E_{\text{CCSD(T)}} = -504.3781902$

4 4.239383000 -0.114239000 0.000000000

|    |              |              |             |
|----|--------------|--------------|-------------|
| 4  | 2.111665000  | -0.088922000 | 0.000000000 |
| 4  | 0.000000000  | -0.022316000 | 0.000000000 |
| 1  | 5.588796000  | -0.117482000 | 0.000000000 |
| 17 | -1.823117000 | 0.059964000  | 0.000000000 |

**Be<sub>3</sub>-H<sub>2</sub>O system**

**A**

$\nu_1 = 25.8$

**E<sub>B97XD</sub>**

|                                             |   |             |
|---------------------------------------------|---|-------------|
| Sum of electronic and zero-point Energies   | = | -120.455003 |
| Sum of electronic and thermal Energies      | = | -120.447468 |
| Sum of electronic and thermal Enthalpies    | = | -120.446524 |
| Sum of electronic and thermal Free Energies | = | -120.486946 |

**E<sub>CCSD(T)</sub> = -120.2159431**

|   |              |              |              |
|---|--------------|--------------|--------------|
| 4 | -1.022416000 | 1.056573000  | 0.223546000  |
| 4 | -1.092503000 | -1.136023000 | 0.082316000  |
| 4 | -2.922928000 | 0.037643000  | -0.116551000 |
| 1 | 1.472757000  | -0.116060000 | 0.051335000  |
| 8 | 2.430796000  | -0.132574000 | -0.053625000 |
| 1 | 2.771654000  | -0.159274000 | 0.839655000  |

**E**

$\nu_1 = 112.9$

**E<sub>B97XD</sub>**

|                                             |   |             |
|---------------------------------------------|---|-------------|
| Sum of electronic and zero-point Energies   | = | -120.641680 |
| Sum of electronic and thermal Energies      | = | -120.635340 |
| Sum of electronic and thermal Enthalpies    | = | -120.634395 |
| Sum of electronic and thermal Free Energies | = | -120.668530 |

**E<sub>CCSD(T)</sub> = -120.377684**

|   |              |              |             |
|---|--------------|--------------|-------------|
| 4 | -0.014202000 | -3.445711000 | 0.000000000 |
| 4 | -0.007075000 | -1.313779000 | 0.000000000 |
| 4 | 0.000000000  | 0.799210000  | 0.000000000 |



|   |              |              |             |
|---|--------------|--------------|-------------|
| 1 | -0.017539000 | -4.797002000 | 0.000000000 |
| 8 | -0.054600000 | 2.211265000  | 0.000000000 |
| 1 | 0.539448000  | 2.948002000  | 0.000000000 |

**Be<sub>3</sub>-HCN system**

**A**

$\nu_1 = 43.2$

**E<sub>B97XD</sub>**

|                                             |   |             |
|---------------------------------------------|---|-------------|
| Sum of electronic and zero-point Energies   | = | -137.443157 |
| Sum of electronic and thermal Energies      | = | -137.435567 |
| Sum of electronic and thermal Enthalpies    | = | -137.434622 |
| Sum of electronic and thermal Free Energies | = | -137.476340 |

**E<sub>CCSD(T)</sub> = -137.1562105**

|   |              |              |              |
|---|--------------|--------------|--------------|
| 4 | -4.028368000 | -0.000409000 | 0.003613000  |
| 4 | -2.137912000 | -1.099456000 | -0.001893000 |
| 4 | -2.138824000 | 1.099826000  | -0.001891000 |
| 1 | 0.803095000  | -0.000025000 | -0.005239000 |
| 6 | 1.877549000  | -0.000007000 | -0.001772000 |
| 7 | 3.021718000  | 0.000032000  | 0.002365000  |

**E**

$\nu_1 = 79.2$

**E<sub>B97XD</sub>**

|                                             |   |             |
|---------------------------------------------|---|-------------|
| Sum of electronic and zero-point Energies   | = | -137.598524 |
| Sum of electronic and thermal Energies      | = | -137.592083 |
| Sum of electronic and thermal Enthalpies    | = | -137.591139 |
| Sum of electronic and thermal Free Energies | = | -137.625303 |

**E<sub>CCSD(T)</sub> = -137.2875259**

|   |             |              |             |
|---|-------------|--------------|-------------|
| 4 | 3.082177000 | -2.857608000 | 0.000000000 |
| 4 | 1.556589000 | -1.374683000 | 0.000000000 |
| 4 | 0.000000000 | 0.060124000  | 0.000000000 |
| 1 | 4.037951000 | -3.808586000 | 0.000000000 |

|   |              |             |             |
|---|--------------|-------------|-------------|
| 6 | -1.267374000 | 1.172294000 | 0.000000000 |
| 7 | -2.141253000 | 1.923356000 | 0.000000000 |
